# Supplementary material for: Anisotropic charge transport in few-layer 2D crystals: the case of Ti3C2Tx MXenes
Source: Research Square preprint supplement (doi:10.21203/rs.3.rs-6057230/v1), 2025-03-26
Supplement: Supplementary file 1 [file 4199d1de2d639ee212f7403c.pdf]

# Anisotropic charge transport in few-layer 2D crystals: the case of $\text{Ti}_3\text{C}_2\text{T}_x$ MXenes

Oriane de Leuze,<sup>\*,†</sup> Fernando Massa Fernandes,<sup>†</sup> Sofiane Arib,<sup>†</sup> Laura Caputo,<sup>†</sup> Ana Pedro Fontes,<sup>†</sup> Viet-Hung Nguyen,<sup>†</sup>  
Hanna Pazniak,<sup>‡</sup> Bernard Nysten,<sup>†</sup> Jean-Christophe Charlier,<sup>†</sup> Sophie Hermans,<sup>†</sup> and Benoît Hackens<sup>\*,†</sup>

<sup>†</sup>IMCN, UCLouvain, Louvain-La-Neuve, Belgium

<sup>‡</sup>LMGP, Université Grenoble-Alpes, Grenoble, France

## Supplementary information

### I) Film characterization

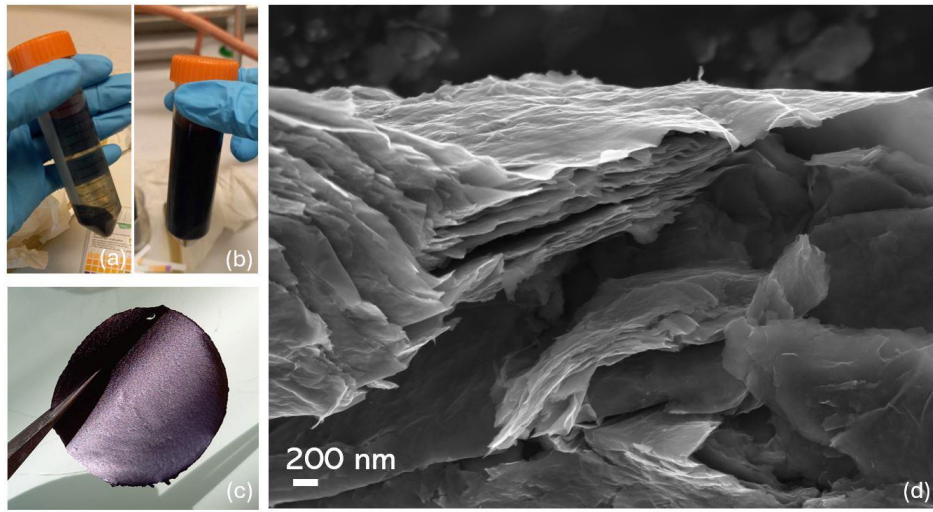

Figure S1: (a) Before and (b) after delamination of the MXenes. (c) Vacuum-dried film of  $\text{Ti}_3\text{C}_2\text{T}_x$ . (d) SEM image of the  $\text{Ti}_3\text{C}_2\text{T}_x$  films.

### II) Sample preparation

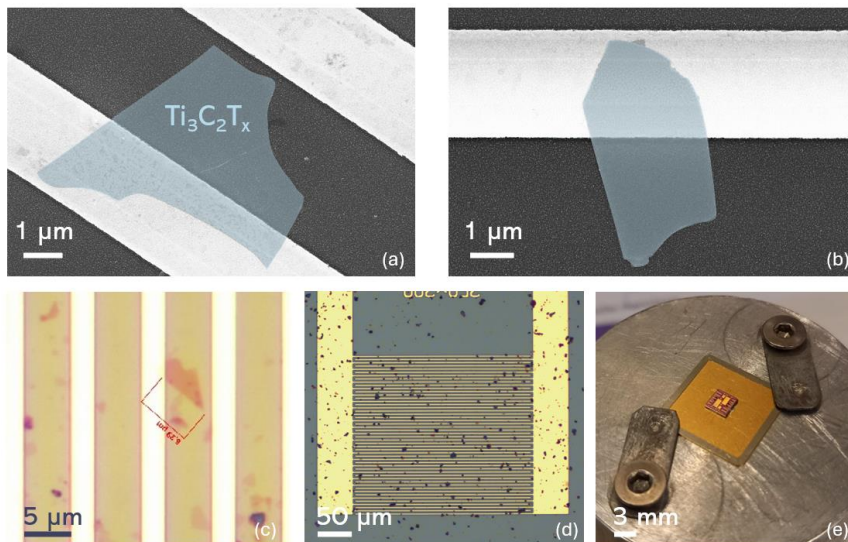

Figure S2: (a-b) SEM images of  $\text{Ti}_3\text{C}_2\text{T}_x$  flakes overlapping a gold electrode and the  $\text{SiO}_2$  substrate. (c-d) Optical microscope images of  $\text{Ti}_3\text{C}_2\text{T}_x$  flakes drop cast on interdigitated electrodes. (e) Image of the sample after bonding on conductive plate.

### III) FEM Simulations

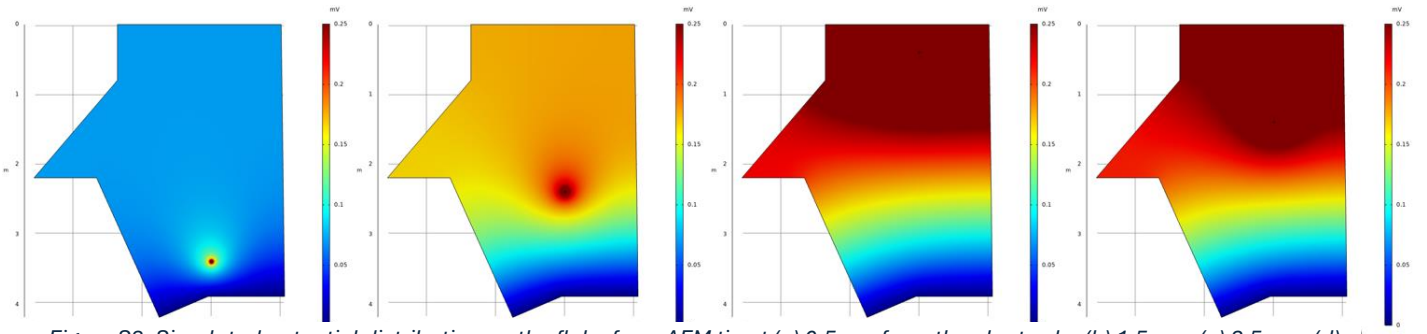

Figure S3: Simulated potential distribution on the flake for c-AFM tip at (a) 0.5  $\mu\text{m}$  from the electrode, (b) 1.5  $\mu\text{m}$ , (c) 2.5  $\mu\text{m}$ , (d) and 3.5  $\mu\text{m}$ .

### IV) C-AFM

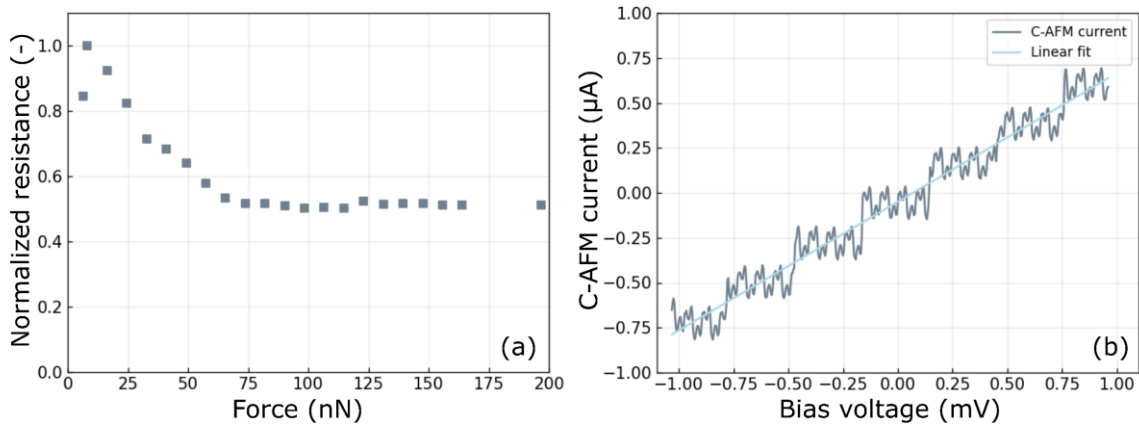

Figure S4: (a) Normalized resistance measured with C-AFM on  $\text{Ti}_3\text{C}_2\text{T}_x$  as a function of the normal force applied on the tip. (b) C-AFM I-V characteristic on a gold electrode, where the steps corresponds to the resolution of the instrument in bias voltage.

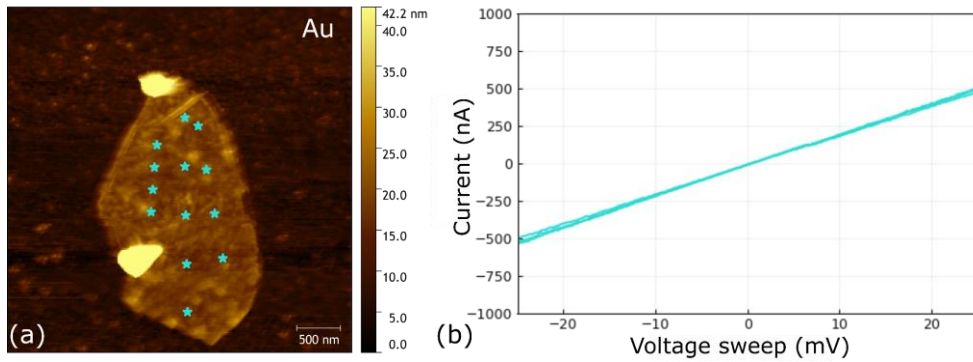

Figure S5: (a) AFM topography image obtained during a C-AFM measurement on a  $\text{Ti}_3\text{C}_2\text{T}_x$  flake deposited on a gold substrate. (b) I-V characteristics acquired at each location represented by a colored star on the topography image in (a).

# V) Ab initio simulation

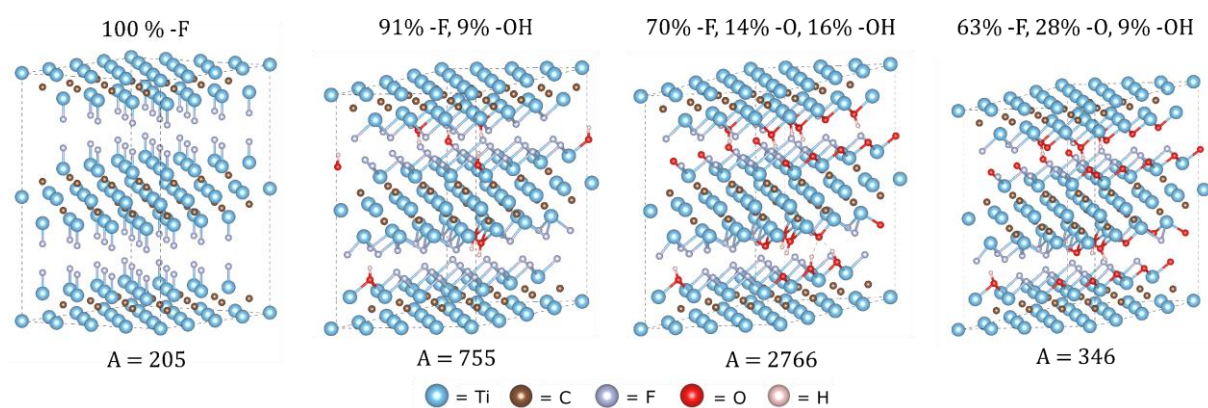

Figure S6: Structurally-optimized atomistic models of  $Ti_3C_2T_x$  supercells incorporating various functional groups (-F, -OH, -O) with different concentrations and their resistivity anisotropy.
